# Supplementary material for: Risk Factors for Anemia and Micronutrient Deficiencies among Women of Reproductive Age—The Impact of the Wheat Flour Fortification Program in Uzbekistan
Source: MDPI journal article supplement (doi:10.3390/nu12030714), 2020-03-07
Supplement: s1 [file s1]

**Supplementary table 1. Results of bivariate analysis of associations of potential risk factors of anemia, iron and folate deficiency, non-pregnant women, Uzbekistan 2017**

| Characteristics                                   | Value                       | Anemia             |                |                      | Iron deficiency             |                |                      | Folate deficiency             |                |                      |
|---------------------------------------------------|-----------------------------|--------------------|----------------|----------------------|-----------------------------|----------------|----------------------|-------------------------------|----------------|----------------------|
|                                                   |                             | Number with anemia | % <sup>a</sup> | P value <sup>b</sup> | Number with iron deficiency | % <sup>a</sup> | P value <sup>b</sup> | Number with folate deficiency | % <sup>a</sup> | P value <sup>b</sup> |
| Demographics                                      |                             |                    |                |                      |                             |                |                      |                               |                |                      |
| Residence                                         | Urban                       | 85                 | 17.8%          | 0.16                 | 237                         | 51.7%          | 0.10                 | 234                           | 49.3%          | 0.09                 |
|                                                   | Rural                       | 275                | 21.7%          |                      | 562                         | 46.9%          |                      | 527                           | 43.9%          |                      |
| Region                                            | Andijon                     | 26                 | 26.3%          | <0.001               | 40                          | 42.1%          | <0.05                | 59                            | 61.5%          | <0.001               |
|                                                   | Bukhara                     | 22                 | 15.8%          |                      | 56                          | 42.4%          |                      | 70                            | 52.2%          |                      |
|                                                   | Ferghana                    | 27                 | 21.6%          |                      | 55                          | 45.8%          |                      | 69                            | 56.6%          |                      |
|                                                   | Jizzakh                     | 17                 | 15.5%          |                      | 42                          | 40.8%          |                      | 52                            | 50.5%          |                      |
|                                                   | Karakalpakstan              | 52                 | 36.9%          |                      | 85                          | 62.0%          |                      | 75                            | 54.3%          |                      |
|                                                   | Kashqadarya                 | 16                 | 13.0%          |                      | 54                          | 45.4%          |                      | 55                            | 45.5%          |                      |
|                                                   | Khorazm                     | 35                 | 23.2%          |                      | 51                          | 41.5%          |                      | 26                            | 21.1%          |                      |
|                                                   | Namangan                    | 13                 | 11.0%          |                      | 56                          | 47.5%          |                      | 66                            | 55.9%          |                      |
|                                                   | Navoiy                      | 17                 | 15.5%          |                      | 58                          | 54.7%          |                      | 44                            | 41.5%          |                      |
|                                                   | Samarkand                   | 13                 | 11.6%          |                      | 48                          | 45.7%          |                      | 33                            | 31.4%          |                      |
|                                                   | Surkhandarya                | 26                 | 16.0%          |                      | 67                          | 45.6%          |                      | 68                            | 46.3%          |                      |
|                                                   | Sirdarya                    | 23                 | 19.0%          |                      | 55                          | 48.2%          |                      | 51                            | 44.7%          |                      |
|                                                   | Tashkent city               | 22                 | 18.3%          |                      | 68                          | 58.6%          |                      | 48                            | 40.7%          |                      |
|                                                   | Tashkent oblast             | 51                 | 41.8%          |                      | 64                          | 54.7%          |                      | 45                            | 38.1%          |                      |
| Households wealth quintile                        | Poorest                     | 66                 | 19.9%          | <0.05                | 136                         | 42.9%          | 0.15                 | 138                           | 44.9%          | 0.72                 |
|                                                   | Second                      | 64                 | 18.1%          |                      | 163                         | 49.0%          |                      | 150                           | 45.0%          |                      |
|                                                   | Middle                      | 83                 | 22.4%          |                      | 159                         | 45.9%          |                      | 145                           | 42.6%          |                      |
|                                                   | Fourth                      | 82                 | 26.3%          |                      | 154                         | 52.0%          |                      | 140                           | 45.3%          |                      |
|                                                   | Wealthiest                  | 63                 | 16.3%          |                      | 184                         | 52.1%          |                      | 183                           | 48.8%          |                      |
| Woman's household had adequate sanitation         | Yes                         | 330                | 21.2%          | 0.54                 | 720                         | 49.3%          | 0.023                | 669                           | 45.3%          | 0.80                 |
|                                                   | No                          | 30                 | 15.5%          |                      | 79                          | 40.2%          |                      | 92                            | 46.5%          |                      |
| Woman's household had access to safe water source | Yes                         | 346                | 20.7%          | 0.78                 | 766                         | 48.5%          | 0.993                | 719                           | 44.9%          | 0.12                 |
|                                                   | No                          | 14                 | 19.2%          |                      | 33                          | 48.6%          |                      | 37                            | 56.3%          |                      |
| Woman's education                                 | Secondary or less           | 158                | 21.2%          | 0.62                 | 314                         | 44.1%          | <0.01                | 329                           | 46.0%          | 0.73                 |
|                                                   | Special secondary or higher | 202                | 20.1%          |                      | 485                         | 51.4%          |                      | 432                           | 45.1%          |                      |
| Woman's age (years)                               | 15-19                       | 35                 | 17.8%          | 0.05                 | 91                          | 49.8%          | 0.53                 | 78                            | 40.5%          | <0.05                |

| Characteristics                        | Value      | Anemia             |                |                      | Iron deficiency             |                |                      | Folate deficiency             |                |                      |
|----------------------------------------|------------|--------------------|----------------|----------------------|-----------------------------|----------------|----------------------|-------------------------------|----------------|----------------------|
|                                        |            | Number with anemia | % <sup>a</sup> | P value <sup>b</sup> | Number with iron deficiency | % <sup>a</sup> | P value <sup>b</sup> | Number with folate deficiency | % <sup>a</sup> | P value <sup>b</sup> |
|                                        | 20-24      | 45                 | 15.3%          |                      | 128                         | 46.3%          |                      | 118                           | 43.2%          |                      |
|                                        | 25-29      | 76                 | 23.7%          |                      | 171                         | 54.0%          |                      | 171                           | 53.1%          |                      |
|                                        | 30-34      | 61                 | 18.1%          |                      | 136                         | 47.2%          |                      | 113                           | 40.4%          |                      |
|                                        | 35-39      | 53                 | 25.7%          |                      | 94                          | 47.1%          |                      | 99                            | 48.9%          |                      |
|                                        | 40-44      | 38                 | 21.3%          |                      | 77                          | 45.2%          |                      | 88                            | 50.4%          |                      |
|                                        | 45-49      | 52                 | 23.0%          |                      | 102                         | 46.6%          |                      | 94                            | 40.5%          |                      |
| Woman's physiology and nutrition       |            |                    |                |                      |                             |                |                      |                               |                |                      |
| Woman currently lactating              | Yes        | 72                 | 20.5%          | 0.97                 | 168                         | 54.1%          | 0.03                 | 172                           | 54.8%          | <0.001               |
|                                        | No         | 288                | 20.6%          |                      | 631                         | 47.0%          |                      | 589                           | 43.2%          |                      |
| Woman smokes cigarettes                | Yes        | 2                  | 25.2%          | 0.76                 | 3                           | 29.7%          | 0.35                 | 6                             | 65.1%          | 0.34                 |
|                                        | No         | 358                | 20.5%          |                      | 796                         | 48.4%          |                      | 755                           | 45.3%          |                      |
| Woman is underweight                   | Yes        | 17                 | 14.8%          | 0.14                 | 41                          | 39.3%          | 0.08                 | 47                            | 45.4%          | 0.99                 |
|                                        | No         | 343                | 20.9%          |                      | 756                         | 48.8%          |                      | 714                           | 45.5%          |                      |
| Woman is overweight/obese              | Yes        | 153                | 20.6%          | 0.99                 | 341                         | 48.3%          | 0.96                 | 334                           | 47.5%          | 0.18                 |
|                                        | No         | 207                | 20.6%          |                      | 456                         | 48.2%          |                      | 427                           | 44.1%          |                      |
| Woman took iron supplements            | Yes        | 39                 | 21.7%          | 0.74                 | 72                          | 42.4%          | 0.10                 | 81                            | 48.3%          | 0.53                 |
| in past 6 months                       | No         | 319                | 20.5%          |                      | 718                         | 49.1%          |                      | 674                           | 45.2%          |                      |
| Woman took folic acid                  | Yes        | 9                  | 19.7%          | 0.86                 | 18                          | 41.8%          | 0.37                 | 28                            | 60.4%          | 0.06                 |
| supplements in past 6 months           | No         | 350                | 20.7%          |                      | 775                         | 48.7%          |                      | 729                           | 45.2%          |                      |
| Woman had minimal dietary              | Yes        | 142                | 20.2%          | 0.94                 | 335                         | 49.8%          | 0.31                 | 322                           | 48.1%          | 0.17                 |
| diversity past day                     | No         | 199                | 20.3%          |                      | 436                         | 47.1%          |                      | 418                           | 44.3%          |                      |
| Woman consumed iron-rich               | Yes        | 74                 | 18.9%          | 0.44                 | 175                         | 46.3%          | 0.44                 | 160                           | 42.0%          | 0.12                 |
| foods past day <sup>c</sup>            | No         | 279                | 20.8%          |                      | 613                         | 48.8%          |                      | 592                           | 46.5%          |                      |
| Woman consumed folate-rich             | Yes        | 203                | 19.7%          | 0.43                 | 464                         | 48.3%          | 0.90                 | 439                           | 44.6%          | 0.40                 |
| foods past day <sup>d</sup>            | No         | 145                | 21.5%          |                      | 314                         | 47.9%          |                      | 305                           | 46.9%          |                      |
| Iron intake from                       | 0%         | 228                | 19.5%          | 0.22                 | 541                         | 49.6%          | 0.40                 | 544                           | 49.2%          | <0.001               |
| fortified flour                        | >0 – 39.9% | 63                 | 21.8%          |                      | 128                         | 44.6%          |                      | 101                           | 34.2%          |                      |
| (as % RNI)                             | 40+%       | 48                 | 24.8%          |                      | 84                          | 48.2%          |                      | 59                            | 31.1%          |                      |
| Folate intake from                     | 0%         | 228                | 19.5%          | 0.27                 | 541                         | 49.6%          | 0.41                 | 544                           | 49.2%          | <0.001               |
| Fortified flour                        | >0 – 69.9% | 61                 | 22.2%          |                      | 121                         | 44.6%          |                      | 97                            | 34.7%          |                      |
| (as % RNI)                             | 70+%       | 50                 | 24.0%          |                      | 91                          | 48.0%          |                      | 63                            | 30.7%          |                      |
| Woman micro-nutrition and inflammation |            |                    |                |                      |                             |                |                      |                               |                |                      |
| Woman has inflammation                 | Yes        | 53                 | 17.4%          | 0.20                 | 123                         | 43.4%          | 0.10                 | 149                           | 53.7%          | <0.01                |

| Characteristics                 | Value | Anemia             |                |                      | Iron deficiency             |                |                      | Folate deficiency             |                |                      |
|---------------------------------|-------|--------------------|----------------|----------------------|-----------------------------|----------------|----------------------|-------------------------------|----------------|----------------------|
|                                 |       | Number with anemia | % <sup>a</sup> | P value <sup>b</sup> | Number with iron deficiency | % <sup>a</sup> | P value <sup>b</sup> | Number with folate deficiency | % <sup>a</sup> | P value <sup>b</sup> |
| Woman is iron deficient         | No    | 273                | 20.9%          | <0.001               | 676                         | 49.4%          |                      | 605                           | 43.5%          | 0.31                 |
|                                 | Yes   | 62                 | 33.3%          |                      |                             |                |                      | 373                           | 46.7%          |                      |
|                                 | No    | 273                | 7.9%           |                      |                             |                |                      | 381                           | 44.0%          |                      |
| Woman is vitamin A insufficient | Yes   | 144                | 30.3%          | <0.001               | 283                         | 61.8%          | 0.31                 | 203                           | 43.5%          | 0.44                 |
|                                 | No    | 180                | 16.1%          |                      | 480                         | 42.8%          |                      | 512                           | 45.9%          |                      |
|                                 | Yes   | 167                | 21.6%          |                      | 373                         | 49.8%          |                      |                               |                |                      |
| Woman is folate deficient       | No    | 170                | 19.0%          | 0.22                 | 426                         | 47.1%          | 0.82                 |                               |                |                      |
|                                 | Yes   | 65                 | 19.9%          |                      | 154                         | 47.7%          |                      | 138                           | 41.9%          |                      |
|                                 | No    | 272                | 20.2%          |                      | 645                         | 48.5%          |                      | 623                           | 46.3%          |                      |

Note: The n's are un-weighted numbers for each subgroup.

<sup>a</sup> Percentages or means are weighted for unequal probability of selection, except distribution of regions.

<sup>b</sup> Chi-square test; P values <0.1 were retained in the multivariable model, except for iron and folate intakes (as % RNI) which were forced into the model regardless of the results of the bivariate analysis.

<sup>c</sup> The following food groups were included here: a) liver, kidney, heart, or other organ meats; b) any meat, such as beef, lamb, goat, chicken, rabbit or duck.

<sup>d</sup> The following food groups were included here: a) nuts and seeds; b) any dark green leafy vegetables; c) any foods made from beans, peas, lentils; d) liver, kidney, heart, or other organ meats.
